# Supplementary material for: Screen for Footprints of Selection during Domestication/Captive Breeding of Atlantic Salmon
Source: Comp Funct Genomics. 2012 Dec 27;2012:628204. doi: 10.1155/2012/628204 (PMC3544263; doi:10.1155/2012/628204)
Supplement: Supplementary file 1 — Marker and genetic map information of studied SNP and microsatellite loci. [file 628204.f1.zip]

Archive with 2 entries (2 files):
- mat.628204.v1.xls
- mat.628204.v2.xlsx
