# Supplementary material for: Screen for Footprints of Selection during Domestication/Captive Breeding of Atlantic Salmon
Source: Comp Funct Genomics. 2012 Dec 27;2012:628204. doi: 10.1155/2012/628204 (PMC3544263; doi:10.1155/2012/628204)
Supplement: Supplementary file 1 — Marker and genetic map information of studied SNP and microsatellite loci. [file 628204.f1.zip › mat.628204.v2.xlsx]

## Sheet: Sheet1
	Supporting information. Marker and genetic map information.
	Locus	Alternative	Linkage	Map	Marker	Reference	GenBank
		name	group	position	type		accession
				cM			number
	Ssa202DU		d01	0	Microsatellite	O'Reilly et al. 1996	U43695
	16240_0204		d01	17.1	SNP	Moen et al. 2008
	Ssa406UoS		d01	66	Microsatellite	Cairney et al. 2000	AJ402723
	16905_0208		d01	85.5	SNP	Moen et al. 2008
	15447_0553		d01	103.8	SNP	Moen et al. 2008
	15919_0533		d02	0	SNP	Moen et al. 2008
	14892_0586		d02	4.8	SNP	Moen et al. 2008
	16692_1970		d02	10.8	SNP	Moen et al. 2008
	14649_80		d02	14.7	SNP	Moen et al. 2008
	12124_0433		d02	21.1	SNP	Moen et al. 2008
	17112_0405		d02	28.3	SNP	Moen et al. 2008
	16117_1184		d02	29	SNP	Moen et al. 2008
	16654_489		d02	31.1	SNP	Moen et al. 2008
	16329_0470		d02	31.4	SNP	Moen et al. 2008
	14579_490		d02	36.6	SNP	Moen et al. 2008
	16387_254		d02	37.6	SNP	Moen et al. 2008
	14291_364		d02	46.5	SNP	Moen et al. 2008
	14058_0333		d02	46.9	SNP	Moen et al. 2008
	14184_0131		d02	59.3	SNP	Moen et al. 2008
	14746_388		d02	67.7	SNP	Moen et al. 2008
	16209_1298		d02	67.7	SNP	Moen et al. 2008
	12271_351		d02		SNP	Moen et al. 2008; Lien et al. 2011
	12271_391		d02		SNP	Moen et al. 2008; Lien et al. 2011
	14342_489		d02		SNP	Moen et al. 2008; Lien et al. 2011
	16913_1267		d02		SNP	Moen et al. 2008; Lien et al. 2011
	16913_418		d02		SNP	Moen et al. 2008; Lien et al. 2011
	13623_479		d03	0.5	SNP	Moen et al. 2008
	15228_0290		d03	2.2	SNP	Moen et al. 2008
	16867_136		d03	4.8	SNP	Moen et al. 2008
	12400_0163		d03	13.7	SNP	Moen et al. 2008
	17015_1763		d03	21.2	SNP	Moen et al. 2008
	16958_0078		d03	21.2	SNP	Moen et al. 2008
	12386_223		d03	24.1	SNP	Moen et al. 2008
	17364_0264		d03	26.6	SNP	Moen et al. 2008
	17321_0691		d03	27.4	SNP	Moen et al. 2008
	17113_1162		d03	69.7	SNP	Moen et al. 2008
	16265_112		d03		SNP	Moen et al. 2008; Lien et al. 2011
	Ssa171DU		d04	40.6	Microsatellite	O'Reilly et al. 1996	U43693
	14686_659		d04	53.3	SNP	Moen et al. 2008
	14194_0507		d04	55.8	SNP	Moen et al. 2008
	14671_0627		d04	60.6	SNP	Moen et al. 2008
	17081_268		d04	79.6	SNP	Moen et al. 2008
	15164_0451		d04	86.2	SNP	Moen et al. 2008
	14201_0395		d04	90	SNP	Moen et al. 2008
	14969_0223		d04	99.6	SNP	Moen et al. 2008
	17067_0557		d04	110.9	SNP	Moen et al. 2008
	14974_588		d04	112.7	SNP	Moen et al. 2008
	15190_1379		d04		SNP	Moen et al. 2008; Lien et al. 2011
	15190_872		d04		SNP	Moen et al. 2008; Lien et al. 2011
	16361_472		d04		SNP	Moen et al. 2008; Lien et al. 2011
	16294_0244		d05	3.8	SNP	Moen et al. 2008
	15158_0275		d05	9.9	SNP	Moen et al. 2008
	17611_0091		d05	9.9	SNP	Moen et al. 2008
	16731_596		d05	28.6	SNP	Moen et al. 2008
	17525_0116		d05	30.4	SNP	Moen et al. 2008
	16843_0842		d05	55.5	SNP	Moen et al. 2008
	14174_0149		d05	55.5	SNP	Moen et al. 2008
	15622_362		d05		SNP	Moen et al. 2008; Lien et al. 2011
	15686_402		d05		SNP	Moen et al. 2008; Lien et al. 2011
	15686_55		d05		SNP	Moen et al. 2008; Lien et al. 2011
	16055_561		d05		SNP	Moen et al. 2008; Lien et al. 2011
	17428_1100		d05		SNP	Moen et al. 2008; Lien et al. 2011
	17428_1391		d05		SNP	Moen et al. 2008; Lien et al. 2011
	16780_0490		d06	42.8	SNP	Moen et al. 2008
	12100_0413		d06	49.9	SNP	Moen et al. 2008
	14161_559		d06	52.6	SNP	Moen et al. 2008
	16937_940		d06	57.4	SNP	Moen et al. 2008
	SSsp2210		d06	57.8	Microsatellite	Patterson et al. 2004	AY081808
	17580_1116		d06	57.8	SNP	Moen et al. 2008
	14355_0568		d06	63.8	SNP	Moen et al. 2008
	15927_0421		d06	66.4	SNP	Moen et al. 2008
	16844_0203		d06	67.5	SNP	Moen et al. 2008
	DAA		d06	69.5	Minisatellite	Stet et al. 2002
	16129_0239		d06	73.5	SNP	Moen et al. 2008
	15535_0270		d06	76.3	SNP	Moen et al. 2008
	12158_0428		d06	80.8	SNP	Moen et al. 2008
	15496_116		d06		SNP	Moen et al. 2008; Lien et al. 2011
	BHMS269		d07	0	Microsatellite	http://www.salmongenome.no/	AF256689
	SSsp2216		d07	46.3	Microsatellite	Patterson et al. 2004	AY081811
	12320_396		d07	46.3	SNP	Moen et al. 2008
	16677_0620		d07	50.9	SNP	Moen et al. 2008
	SSsp2215		d07	56.8	Microsatellite	Patterson et al. 2004	AY081810
	13628_263		d08	18.2	SNP	Moen et al. 2008
	15711_0373		d08	18.8	SNP	Moen et al. 2008
	15097_0126		d08	25.1	SNP	Moen et al. 2008
	Ssa98DU		d08	29.4	Microsatellite	O'Reilly et al. 1996	AF019195
	16559_0546		d08	41.7	SNP	Moen et al. 2008
	16890_1072		d08	46.2	SNP	Moen et al. 2008
	14490_591		d08	48.7	SNP	Moen et al. 2008
	16903_662		d08	48.7	SNP	Moen et al. 2008
	Ssa197DU		d08	49.5	Microsatellite	O'Reilly et al. 1996	U43694
	14157_572		d08		SNP	Moen et al. 2008; Lien et al. 2011
	15768_574		d08		SNP	Moen et al. 2008; Lien et al. 2011
	17020_1533		d09a	0	SNP	Moen et al. 2008
	13513_0493		d09a	18.2	SNP	Moen et al. 2008
	SSOSL438		d09a	33.7	Microsatellite	Slettan et al. 1996	Z49134
	14800_360		d09b	0	SNP	Moen et al. 2008
	13108_154		9		SNP	Moen et al. 2008; Lien et al. 2011
	14031_166		9		SNP	Moen et al. 2008; Lien et al. 2011
	14031_406		9		SNP	Moen et al. 2008; Lien et al. 2011
	15918_614		9		SNP	Moen et al. 2008; Lien et al. 2011
	16776_131		9		SNP	Moen et al. 2008; Lien et al. 2011
	15042_307		d10	0	SNP	Moen et al. 2008
	15251_0270		d10	42	SNP	Moen et al. 2008
	15230_258		d10	55.6	SNP	Moen et al. 2008
	15879_0611		d10	59.8	SNP	Moen et al. 2008
	17059_1233		d10	63.1	SNP	Moen et al. 2008
	17454_0240		d10	69.9	SNP	Moen et al. 2008
	16207_0498		d10	83.1	SNP	Moen et al. 2008
	17309_480		d10	90	SNP	Moen et al. 2008
	13981_262		d10		SNP	Moen et al. 2008; Lien et al. 2011
	13981_311		d10		SNP	Moen et al. 2008; Lien et al. 2011
	13981_575		d10		SNP	Moen et al. 2008; Lien et al. 2011
	15610_550		d10		SNP	Moen et al. 2008; Lien et al. 2011
	16811_56		d10		SNP	Moen et al. 2008; Lien et al. 2011
	13699_0319		d11	0	SNP	Moen et al. 2008
	14711_157		d11	0.5	SNP	Moen et al. 2008
	12578_0095		d11	1.7	SNP	Moen et al. 2008
	16907_0342		d11	31.8	SNP	Moen et al. 2008
	14389_0361		d11	53.8	SNP	Moen et al. 2008
	Ssa417UoS		d11	55.1	Microsatellite	Cairney et al. 2000	AJ402734
	15958_206		d11	61.9	SNP	Moen et al. 2008
	15804_0172		d11	101.9	SNP	Moen et al. 2008
	15119_356		d11		SNP	Moen et al. 2008; Lien et al. 2011
	15119_669		d11		SNP	Moen et al. 2008; Lien et al. 2011
	16551_442		d11		SNP	Moen et al. 2008; Lien et al. 2011
	13924_0444		d12	0	SNP	Moen et al. 2008
	14722_480		d12	2.3	SNP	Moen et al. 2008
	16691_0375		d12	4.2	SNP	Moen et al. 2008
	13454_0078		d12	20.5	SNP	Moen et al. 2008
	16466_1044		d12	35.6	SNP	Moen et al. 2008
	16188_0156		d12	36.7	SNP	Moen et al. 2008
	15770_410		d12	60.9	SNP	Moen et al. 2008
	OMM1070		d12	72.1	Microsatellite	Rexroad et al. 2001	AF375019
	17368_0088		d12	72.1	SNP	Moen et al. 2008
	15386_0484		d12	95.9	SNP	Moen et al. 2008
	14757_562		d12		SNP	Moen et al. 2008; Lien et al. 2011
	15912_0572		d13	0	SNP	Moen et al. 2008
	Ssa407UoS		d13	4.4	Microsatellite	Cairney et al. 2000	AJ402724
	14358_429		d13	16.7	SNP	Moen et al. 2008
	16609_0285		d13	17.6	SNP	Moen et al. 2008
	13218_0324		d13	19.4	SNP	Moen et al. 2008
	11825_0236		d13	22.9	SNP	Moen et al. 2008
	14714_122		d13	23.4	SNP	Moen et al. 2008
	17495_0157		d13	29.4	SNP	Moen et al. 2008
	BHMS311		d14	14.9	Microsatellite	http://www.salmongenome.no/	AF256730
	17489_0078		d14	14.9	SNP	Moen et al. 2008
	17222_0301		d14	19.9	SNP	Moen et al. 2008
	16856_0321		d14	25.8	SNP	Moen et al. 2008
	BHMS386		d15	4.6	Microsatellite	http://www.salmongenome.no/	AF256712
	MHCI		d15	14.3	Microsatellite	Grimholt et al. 2002	AF504016
	17293_0832		d15	23.2	SNP	Moen et al. 2008
	17429_1139		d15	38.4	SNP	Moen et al. 2008
	16926_1498		d15		SNP	Moen et al. 2008; Lien et al. 2011
	16926_669		d15		SNP	Moen et al. 2008; Lien et al. 2011
	16791_0446		d16	0	SNP	Moen et al. 2008
	16973_559		d16	28.9	SNP	Moen et al. 2008
	15513_384		d16	35.6	SNP	Moen et al. 2008
	16363_817		d16	35.6	SNP	Moen et al. 2008
	16967_0522		d16	38.3	SNP	Moen et al. 2008
	16855_383		d16	43.2	SNP	Moen et al. 2008
	17290_213		d17b	8.2	SNP	Moen et al. 2008
	16768_0432		d17b	13.7	SNP	Moen et al. 2008
	13344_0491		d17b	13.7	SNP	Moen et al. 2008
	11898_0329		d17b	19.7	SNP	Moen et al. 2008
	16226_0067		d17b	19.7	SNP	Moen et al. 2008
	16585_0088		d17b	25	SNP	Moen et al. 2008
	15118_153		d17b	53.3	SNP	Moen et al. 2008
	14230_0080		d17b	76	SNP	Moen et al. 2008
	SSsp1605		d18	0	Microsatellite	Patterson et al. 2004	AY081812
	13137_0137		d18	2.2	SNP	Moen et al. 2008
	14186_163		d18	25.7	SNP	Moen et al. 2008
	Ssa85DU		d18	36.4	Microsatellite	O'Reilly et al. 1996	U43692
	17239_1531		d18	49.1	SNP	Moen et al. 2008
	16140_0475		d18	65.8	SNP	Moen et al. 2008
	15004_0676		d19	0	SNP	Moen et al. 2008
	15784_1161		d19	7.9	SNP	Moen et al. 2008
	BHMS365		d19	24.9	Microsatellite	http://www.salmongenome.no/	AF256703
	16147_0613		d19	26.8	SNP	Moen et al. 2008
	17230_430		d20	0	SNP	Moen et al. 2008
	17071_586		d20	13.3	SNP	Moen et al. 2008
	13063_0331		d20	14.5	SNP	Moen et al. 2008
	13933_0262		d20	26.5	SNP	Moen et al. 2008
	15309_266		d20	38.7	SNP	Moen et al. 2008
	15472_446		d20		SNP	Moen et al. 2008; Lien et al. 2011
	15472_73		d20		SNP	Moen et al. 2008; Lien et al. 2011
	15917_0670		d21	8.6	SNP	Moen et al. 2008
	15597_303		d21	9	SNP	Moen et al. 2008
	16710_407		d21	9.7	SNP	Moen et al. 2008
	15868_0527		d21	24.2	SNP	Moen et al. 2008
	12869_0119		d21	33.6	SNP	Moen et al. 2008
	13419_0141		d21	41.4	SNP	Moen et al. 2008
	14637_535		d22	0	SNP	Moen et al. 2008
	14638_214		d22	0.8	SNP	Moen et al. 2008
	12000_0548		d22	0.9	SNP	Moen et al. 2008
	14899_0107		d22	5.7	SNP	Moen et al. 2008
	15209_1301		d22	7.7	SNP	Moen et al. 2008
	12302_129		d22		SNP	Moen et al. 2008; Lien et al. 2011
	16353_0101		d23	19	SNP	Moen et al. 2008
	15255_361		d23	23.4	SNP	Moen et al. 2008
	15556_147		d23	25.4	SNP	Moen et al. 2008
	16628_1277		d23	27.6	SNP	Moen et al. 2008
	14053_0820		d23	33.4	SNP	Moen et al. 2008
	15393_948		d23	33.4	SNP	Moen et al. 2008
	15603_0406		d23	43.9	SNP	Moen et al. 2008
	11981_0368		d23	98.7	SNP	Moen et al. 2008
	16258_0579		d24	0	SNP	Moen et al. 2008
	16112_0244		d24	84.4	SNP	Moen et al. 2008
	14970_0345		d24	95.8	SNP	Moen et al. 2008
	13579_599		d24	103.7	SNP	Moen et al. 2008
	15806_1219		d24		SNP	Moen et al. 2008; Lien et al. 2011
	16787_1639		d25	8	SNP	Moen et al. 2008
	16260_0757		d25	8.8	SNP	Moen et al. 2008
	15690_536		d25	9.5	SNP	Moen et al. 2008
	13907_0121		d25	18.1	SNP	Moen et al. 2008
	14071_338		d25		SNP	Moen et al. 2008; Lien et al. 2011
	14071_82		d25		SNP	Moen et al. 2008; Lien et al. 2011
	13197_0590		d28	1	SNP	Moen et al. 2008
	Ssa405UoS		d28	8.4	Microsatellite	Cairney et al. 2000	AJ402722
	16231_842		d28	17.7	SNP	Moen et al. 2008
	15528_0682		d28	39.1	SNP	Moen et al. 2008
	14035_0356		d28	102	SNP	Moen et al. 2008
	15618_92		d31	0	SNP	Moen et al. 2008
	16763_445		d31	5.2	SNP	Moen et al. 2008
	Ogo4UW		d31	10.3	Microsatellite	http://www.salmongenome.no/	AF009796
	16317_0150		d31	29.2	SNP	Moen et al. 2008
	13615_417		d32		SNP	Moen et al. 2008; Lien et al. 2011
	13615_543		d32		SNP	Moen et al. 2008; Lien et al. 2011
	15360_434		d32		SNP	Moen et al. 2008; Lien et al. 2011
	14501_498		d33	0	SNP	Moen et al. 2008
	14962_456		d33	33.6	SNP	Moen et al. 2008
	16532_248		d33	52.5	SNP	Moen et al. 2008
	BHMS144		d33	54	Microsatellite	http://www.salmongenome.no/	AF256665
	12035_0440		d33	54	SNP	Moen et al. 2008
	15153_346		d33	56.2	SNP	Moen et al. 2008
	17396_2690		d33		SNP	Moen et al. 2008; Lien et al. 2011
	12688_553		dA	0	SNP	Moen et al. 2008
	16378_0529		dA	2.5	SNP	Moen et al. 2008
	16221_0769		dA	9.5	SNP	Moen et al. 2008
	15482_813		dA	19.8	SNP	Moen et al. 2008
	12302_196		X	X	SNP	Moen et al. 2008
	12810_0361		X	X	SNP	Moen et al. 2008
	12810_0403		X	X	SNP	Moen et al. 2008
	14157_248		X	X	SNP	Moen et al. 2008
	14157_291		X	X	SNP	Moen et al. 2008
	14302_0526		X	X	SNP	Moen et al. 2008
	14302_0573		X	X	SNP	Moen et al. 2008
	14392_0403		X	X	SNP	Moen et al. 2008
	14392_0428		X	X	SNP	Moen et al. 2008
	14392_0452		X	X	SNP	Moen et al. 2008
	15107_0389		X	X	SNP	Moen et al. 2008
	15141_0339		X	X	SNP	Moen et al. 2008
	15339_0200		X	X	SNP	Moen et al. 2008
	15486_0332		X	X	SNP	Moen et al. 2008
	15496_490		X	X	SNP	Moen et al. 2008
	15552_72		X	X	SNP	Moen et al. 2008
	15610_504		X	X	SNP	Moen et al. 2008
	15768_437		X	X	SNP	Moen et al. 2008
	15806_943		X	X	SNP	Moen et al. 2008
	15897_0290		X	X	SNP	Moen et al. 2008
	16053_0071		X	X	SNP	Moen et al. 2008
	16053_552		X	X	SNP	Moen et al. 2008
	16109_0535		X	X	SNP	Moen et al. 2008
	16109_0600		X	X	SNP	Moen et al. 2008
	16308_0302		X	X	SNP	Moen et al. 2008
	16308_0425		X	X	SNP	Moen et al. 2008
	16405_0153		X	X	SNP	Moen et al. 2008
	16571_0193		X	X	SNP	Moen et al. 2008
	16571_0194		X	X	SNP	Moen et al. 2008
	16686_0431		X	X	SNP	Moen et al. 2008
	16688_0128		X	X	SNP	Moen et al. 2008
	16688_0280		X	X	SNP	Moen et al. 2008
	16776_547		X	X	SNP	Moen et al. 2008
	16811_334		X	X	SNP	Moen et al. 2008
	16910_0318		X	X	SNP	Moen et al. 2008
	16910_0387		X	X	SNP	Moen et al. 2008
	16913_380		X	X	SNP	Moen et al. 2008
	16926_941		X	X	SNP	Moen et al. 2008
	16938_271		X	X	SNP	Moen et al. 2008
	16938_888		X	X	SNP	Moen et al. 2008
	16939_0335		X	X	SNP	Moen et al. 2008
	17061_0410		X	X	SNP	Moen et al. 2008
	17164_0089		X	X	SNP	Moen et al. 2008
	17396_1622		X	X	SNP	Moen et al. 2008
	BHMS189		X	X	Microsatellite	http://www.salmongenome.no/	AF256676
	BHMS7-043		X	X	Microsatellite	http://www.salmongenome.no/	AF256676
	CA039983	EST123	X	X	Microsatellite	Vasemägi et al. 2005d	CA039983
	CA040282	EST41	X	X	Microsatellite	Vasemägi et al. 2005d	CA040282
	CA040580	EST42	X	X	Microsatellite	Vasemägi et al. 2005d	CA040580
	CA041953	EST115	X	X	Microsatellite	Vasemägi et al. 2005d	CA041953
	CA047220	EST107	X	X	Microsatellite	Vasemägi et al. 2005d	CA047220
	CA047718	EST105	X	X	Microsatellite	Vasemägi et al. 2005d	CA047718
	CA047944	EST44	X	X	Microsatellite	Vasemägi et al. 2005d	CA047944
	CA048302	EST103	X	X	Microsatellite	Vasemägi et al. 2005d	CA048302
	CA048828	EST101	X	X	Microsatellite	Vasemägi et al. 2005d	CA048828
	CA053162	EST46	X	X	Microsatellite	Vasemägi et al. 2005d	CA053162
	CA053293	EST40	X	X	Microsatellite	Vasemägi et al. 2005d	CA053293
	CA056586	EST58	X	X	Microsatellite	Vasemägi et al. 2005d	CA056586
	CA058557	EST6	X	X	Microsatellite	Vasemägi et al. 2005d	CA058557
	CA058580	EST53	X	X	Microsatellite	Vasemägi et al. 2005d	CA058580
	CA059136	EST74	X	X	Microsatellite	Vasemägi et al. 2005d	CA059136
	CA060177	EST19	X	X	Microsatellite	Vasemägi et al. 2005d	CA060177
	CA060208	EST11	X	X	Microsatellite	Vasemägi et al. 2005d	CA060208
	CA062844	EST68	X	X	Microsatellite	Vasemägi et al. 2005d	CA062844
	CA064557	EST28	X	X	Microsatellite	Vasemägi et al. 2005d	CA064557
	CA769358	EST22	X	X	Microsatellite	Vasemägi et al. 2005d	CA769358
	Hsp		X	X	Microsatellite	Vasemägi et al. 2005b	BG934281
	OMM1121		X	X	Microsatellite	Rexroad et al. 2001	AF375027
	OMM1134		X	X	Microsatellite	Rexroad et al. 2001	AY039628
	OMM1374		X	X	Microsatellite	Rexroad et al. 2001	BV005163
	OMM1400		X	X	Microsatellite	Rexroad et al. 2001	BV078086
	Omy14INRA		X	X	Microsatellite	Gharbi, K., and R. Guyomard, Jouy-en-Josas, INRA
	Omy272UoG/ii		X	X	Microsatellite	Jackson et al. (1998)
	Omy7INRA		X	X	Microsatellite	Gharbi, K., and R. Guyomard, Jouy-en-Josas, INRA
	OmyRGT44TUF		X	X	Microsatellite	A. Ozaki & N. Okamoto, pers. comm., TUF, Japan	AB087611
	Sleei53		X	X	Microsatellite	Gilbey et al. 2004
	Sleen82		X	X	Microsatellite	Gilbey et al. 2004
	Ssa124		X	X	Microsatellite	http://www.salmongenome.no/
	Ssa14DU		X	X	Microsatellite	McConnell et al. 1995
	Ssa224		X	X	Microsatellite	http://www.salmongenome.no/	AF019168
	Ssa289DU		X	X	Microsatellite	McConnell et al. 1995
	Ssa402UoS		X	X	Microsatellite	Cairney et al. 2000	AJ402719
	Ssa412UoS		X	X	Microsatellite	Cairney et al. 2000	AJ402729
	Ssa419UoS		X	X	Microsatellite	Cairney et al. 2000	AJ402736
	Ssa4DIAS		X	X	Microsatellite	L-E. Holm, pers. comm., Danish Institute of Agricultural Sciences
	Ssd30		X	X	Microsatellite	O'Reilly et al. 1996
	Ssf43		X	X	Microsatellite	Sánchez et al. 1996
	Ssleer15.1		X	X	Microsatellite	Gilbey et al. 2004
	SSOSL25		X	X	Microsatellite	Slettan et al. 1995	Z48581
	SSOSL85		X	X	Microsatellite	Slettan et al. 1995	Z48596
	SSsp2201		X	X	Microsatellite	Patterson et al. 2004	AY081807
			X - no linkage information
